# Supplementary material for: Inactivation of Sirt6 ameliorates muscular dystrophy in mdx mice by releasing suppression of utrophin expression
Source: PubMed Central journal article supplement (PMC9300598; doi:10.1038/s41467-022-31798-z), 2022-07-20
Supplement: 41467_2022_31798_MOESM3_ESM.pdf [file 41467_2022_31798_MOESM3_ESM.pdf]

## **Description of Additional Supplementary Files**

File Name: Supplementary Data 1

Description: List of primers used for genotyping, RT-qPCR and chromatin IP.
